# Supplementary material for: A mild deuterium exchange reaction of free carboxylic acids by photochemical decarboxylation
Source: Royal Society of Chemistry journal article supplement (doi:10.1039/c0cc01464h), 2010-01-01

## **Supplementary Information**

### **A mild deuterium exchange reaction of free carboxylic acids by photochemical decarboxylation**

Tatsuya Itou <sup>a,\*</sup>, Yasuharu Yoshimi <sup>b,\*</sup>, Keisuke Nishikawa <sup>b</sup>, Toshio Morita <sup>b</sup>, Yutaka Okada <sup>a</sup>,  
Nobuyuki Ichinose <sup>c</sup> and Minoru Hatanaka <sup>d</sup>

<sup>a</sup> *Department of Applied Chemistry, College of Life Sciences, Ritsumeikan University, 1-1-1  
Noji-Higashi, Kusatsu 525-8577, Japan, E-mail: t-itou@fc.ritsumei.ac.jp; Tel: +81-77-561-2810*

<sup>b</sup> *Department of Applied Chemistry and Biotechnology, Graduate School of Engineering, University  
of Fukui, 3-9-1 Bunkyo, Fukui 910-8507, Japan*

<sup>c</sup> *Department of Chemistry and Materials Technology, Kyoto Institute of Technology, Matsugasaki,  
Sakyo-ku, Kyoto, 606-8585, Japan*

<sup>d</sup> *Department of Medicinal and Organic Chemistry, School of Pharmacy, Iwate Medical University,  
Yahaba, Iwate 028-3694, Japan*

#### **General**

IR spectra were recorded on JASCO FT/IR-620. <sup>1</sup>H and <sup>13</sup>C NMR were recorded on JEOL JNM-AL500 (500 and 125MHz) and JEOL JNM-AL300 (300 and 75 MHz) spectrometers and for solutions in CDCl<sub>3</sub> containing TMS as an internal standard. High resolution mass spectra (HRMS) were obtained on JEOL JMS-700T. The light source was Riko UV-400HA 400-W high-pressure mercury lamp. Phen and DCB were recrystallized from hexane and EtOAc.

### General Procedure for the Deuterium Exchange via Photochemical Decarboxylation

An acetonitrile-deuterium oxide solution ( $\text{CH}_3\text{CN}/\text{D}_2\text{O} = 98:2$ ,  $\text{CH}_3\text{CN}$  58.8 ml,  $\text{D}_2\text{O}$  1.2 ml) of *N*-Boc-L-amino acid (**1**) (0.6 mmol, 10 mM), phenanthrene (Phen, 0.6 mmol, 10 mM), 1,4-dicyanobenzene (DCB, 0.6 mmol, 10 mM) and *t*-dodecanethiol ( $\text{R}'\text{SH}$ , 1.2 mmol, 20 mM) in four Pyrex (18 mm x 180 mm) was purged with argon for 5 min. The mixture was irradiated with 400-W high-pressure mercury lamp for 8. Then the solvent was evaporated, and the resulting residue was dissolved in EtOAc and washed with water, dried over  $\text{Na}_2\text{SO}_4$ , and concentrated under reduced pressure to yield the corresponding deuterated product (**2**). Similar photoreaction of aliphatic acid (**3c-d**, **5**, **7**) (0.6 mmol, 10 mM), phenanthrene (Phen, 0.6 mmol, 10 mM), 1,4-dicyanobenzene (DCB, 0.6 mmol, 10 mM) and *t*-dodecanethiol ( $\text{R}'\text{SH}$ , 1.2 mmol, 20 mM) in a  $\text{CH}_3\text{CN}-\text{D}_2\text{O}$  solution ( $\text{CH}_3\text{CN}/\text{D}_2\text{O} = 9:1$ ,  $\text{CH}_3\text{CN}$  54 ml,  $\text{D}_2\text{O}$  6 ml) in the presence of 1 equiv. NaOH (0.6 mmol, 10 mM) afforded the deuterated product (**4c-d**, **6**, **8**). These products were isolated by column chromatography on silica gel using hexane and EtOAc as eluents and by preparative HPLC using a GPC column or reversed phase column.

### Characterization Data

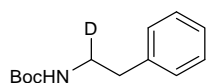

**2a**<sup>1</sup>: IR (KBr,  $\text{cm}^{-1}$ ) 3357, 2962, 1701; <sup>1</sup>H NMR (500 MHz,  $\text{CDCl}_3$ )  $\delta$  7.32-7.18 (m, 5H), 4.53 (s (br), 1H), 3.40-3.36 (m, 1H), 2.80 (d,  $J = 6.7$  Hz, 2H), 1.44 (s, 9H); <sup>13</sup>C NMR (125 MHz,  $\text{CDCl}_3$ )  $\delta$  155.8, 139.0, 128.8, 128.5, 126.3, 79.2, 41.7, 36.2, 28.4; HRMS (FAB) calcd for  $(\text{M}+\text{H})^+$   $\text{C}_{13}\text{H}_{19}\text{DNO}_2$ : 223.1557, found: 223.1550.

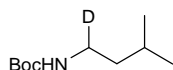

**2b**: IR (KBr,  $\text{cm}^{-1}$ ) 3357, 2963, 1701;  $^1\text{H}$  NMR (500 MHz,  $\text{CDCl}_3$ )  $\delta$  4.46 (s (br), 1H), 3.12 (s (br), 1H), 1.63-1.57 (m, 2H), 1.44 (s, 9H), 0.91 (d,  $J = 6.7$  Hz, 6H);  $^{13}\text{C}$  NMR (125 MHz,  $\text{CDCl}_3$ )  $\delta$  155.9, 79.0, 38.8, 28.4, 25.7, 22.5; HRMS (FAB) calcd for  $(\text{M}+\text{H})^+$   $\text{C}_{10}\text{H}_{21}\text{DNO}_2$ : 189.1713, found: 189.1709.

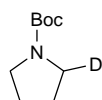

**2c<sup>2</sup>**: IR (KBr,  $\text{cm}^{-1}$ ) 3339, 2961, 1699;  $^1\text{H}$  NMR (500 MHz,  $\text{CDCl}_3$ )  $\delta$  3.33-3.28 (m, 3H), 1.82 (m, 4H), 1.46 (s, 9H);  $^{13}\text{C}$  NMR (125 MHz,  $\text{CDCl}_3$ )  $\delta$  154.7, 78.9, 45.8, 28.5, 25.7; HRMS (FAB) calcd for  $(\text{M}+\text{H})^+$   $\text{C}_9\text{H}_{16}\text{DNO}_2$ : 173.1400, found: 173.1347.

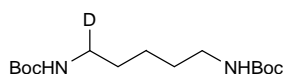

**2d**: IR (KBr,  $\text{cm}^{-1}$ ) 3357, 2982, 1691;  $^1\text{H}$  NMR (500 MHz,  $\text{CDCl}_3$ )  $\delta$  4.54 (s (br), 2H), 3.13-1.10 (m, 3H), 1.59-1.56 (m, 2H), 1.50-1.30 (m, 22H);  $^{13}\text{C}$  NMR (125 MHz,  $\text{CDCl}_3$ )  $\delta$  156.0, 79.0, 40.3, 29.7, 28.4, 23.8; HRMS (FAB) calcd for  $(\text{M}+\text{H})^+$   $\text{C}_{15}\text{H}_{30}\text{DN}_2\text{O}_4$ : 304.2346, found: 304.2332.

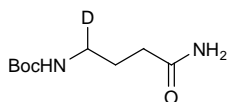

**2e**: IR (KBr,  $\text{cm}^{-1}$ ) 3358, 3200, 2972, 1696, 1637;  $^1\text{H}$  NMR (500 MHz,  $\text{CDCl}_3$ )  $\delta$  6.21 (s (br), 1H), 5.40 (s (br), 1H), 4.75 (s (br), 1H), 3.20 (m, 1H), 2.28 (t,  $J = 6.8$  Hz, 2H), 1.83 (q,  $J = 6.8$  Hz, 2H), 1.44 (s, 9H);  $^{13}\text{C}$  NMR (125 MHz,  $\text{CDCl}_3$ )  $\delta$  175.1, 156.6, 79.4, 39.6, 32.8, 28.1, 25.7; HRMS (FAB) calcd for  $(\text{M}+\text{H})^+$   $\text{C}_9\text{H}_{18}\text{DN}_2\text{O}_3$ : 204.1458, found: 204.1462.

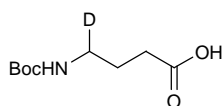

**2f:** IR (KBr,  $\text{cm}^{-1}$ ) 3358, 2972, 1701;  $^1\text{H}$  NMR (500 MHz,  $\text{CDCl}_3$ )  $\delta$  4.65 (s (br), 1H), 3.17 (s (br), 1H), 2.41 (t,  $J = 7.1$  Hz, 2H), 1.84 (q,  $J = 7.1$  Hz, 2H), 1.44 (s, 9H);  $^{13}\text{C}$  NMR (125 MHz,  $\text{CDCl}_3$ )  $\delta$  178.1, 156.2, 76.5, 39.4, 31.2, 28.3, 25.1; HRMS (FAB) calcd for  $(\text{M}+\text{H})^+$   $\text{C}_9\text{H}_{17}\text{DNO}_4$ : 205.1298, found: 205.1296.

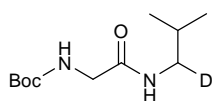

**4a:** IR (KBr,  $\text{cm}^{-1}$ ) 3300, 2964, 1677, 1644, 1530;  $^1\text{H}$  NMR (500 MHz,  $\text{CDCl}_3$ )  $\delta$  6.16 (s, 1H), 5.14 (s, 1H), 3.77 (d,  $J = 6.1$  Hz, 2H), 3.11-3.09 (m, 1H), 1.80-1.73 (m, 1H), 1.46 (s, 9H), 0.92 (d,  $J = 6.7$  Hz, 2H);  $^{13}\text{C}$  NMR (125 MHz,  $\text{CDCl}_3$ )  $\delta$  169.4, 46.7, 46.5, 46.4, 46.2, 44.6, 28.2, 20.0; HRMS (FAB) calcd for  $(\text{M}+\text{H})^+$   $\text{C}_{11}\text{H}_{22}\text{DN}_2\text{O}_3$ : 232.1771, found: 232.1794.

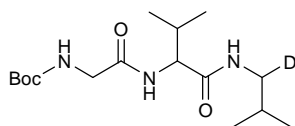

**4b:** IR (KBr,  $\text{cm}^{-1}$ ) 3291, 2964, 1700, 1646, 1516;  $^1\text{H}$  NMR (500 MHz,  $\text{CDCl}_3$ )  $\delta$  6.15 (s, 1H), 5.12 (s, 1H), 3.78 (d,  $J = 6.7$  Hz, 2H), 3.11-3.09 (m, 1H), 1.80-1.73 (m, 1H), 1.46 (s, 9H), 0.92 (d,  $J = 6.7$  Hz, 2H);  $^{13}\text{C}$  NMR (125 MHz,  $\text{CDCl}_3$ )  $\delta$  170.7, 169.4, 58.7, 46.8, 30.5, 28.4, 28.3, 28.2, 20.1, 20.0, 19.3, 17.8; HRMS (FAB) calcd for  $(\text{M}+\text{H})^+$   $\text{C}_{16}\text{H}_{31}\text{DN}_3\text{O}_4$ : 331.2455, found: 331.2434.

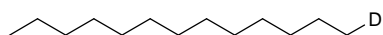

**4c:**  $^1\text{H}$  NMR (500 MHz,  $\text{CDCl}_3$ )  $\delta$  1.31-1.23 (m, 24H), 0.89 (t,  $J = 7.0$  Hz, 5H);  $^{13}\text{C}$  NMR (125 MHz,  $\text{CDCl}_3$ )  $\delta$  31.9, 29.7, 22.7, 14.1.

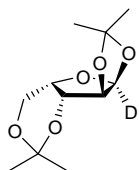

**4d<sup>1,3</sup>**: IR (KBr, cm<sup>-1</sup>) 2962; <sup>1</sup>H NMR (500 MHz, CDCl<sub>3</sub>) δ 4.51 (s, 1H), 4.29 (d, *J* = 2.1 Hz, 1H), 4.15-4.00 (m, 3H), 1.49 (s, 3H), 1.44 (s, 3H), 1.38 (s, 3H), 1.32 (s, 3H); <sup>13</sup>C NMR (125 MHz, CDCl<sub>3</sub>) δ 111.6, 105.2, 97.5, 84.7, 73.2, 71.6, 60.2, 28.9, 26.7, 26.1, 18.7; HRMS (FAB) calcd for (M+H)<sup>+</sup> C<sub>11</sub>H<sub>18</sub>DO<sub>5</sub>: 232.1295, found: 232.1297.

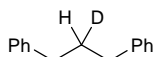

**6<sup>4</sup>**: <sup>1</sup>H NMR (500 MHz, CDCl<sub>3</sub>) δ 7.30-7.25 (m, 5H), 7.19-7.16 (m, 5H), 2.65 (d, *J* = 7.6 Hz, 4H), 1.96-1.92 (m, 1H); <sup>13</sup>C NMR (125 MHz, CDCl<sub>3</sub>) δ 142.2, 128.4, 128.3, 125.7, 35.4, 35.3; HRMS (FAB) calcd for (M+H)<sup>+</sup> C<sub>15</sub>H<sub>16</sub>D: 198.1393, found: 198.1385.

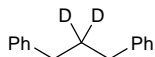

**8<sup>4,5</sup>**: <sup>1</sup>H NMR (500 MHz, CDCl<sub>3</sub>) δ 7.29-7.25 (m, 5H), 7.19-7.16 (m, 5H), 2.64 (s, 4H); <sup>13</sup>C NMR (125 MHz, CDCl<sub>3</sub>) δ 142.2, 128.4, 128.2, 125.7, 35.3, 35.2; HRMS (FAB) calcd for (M+H)<sup>+</sup> C<sub>15</sub>H<sub>15</sub>D<sub>2</sub>: 199.1455, found: 199.1454.

## References

1. Y. Yoshimi, T. Itou and M. Hatanaka, *Chem. Commun.* 2007, 5244.
2. (a) J.-C. Cintrat, F. Pillon and B. Rousseau, *Tetrahedron Lett.* 2001, **42**, 5001. (b) N. Faucher, J.-C. Cintrat and B. Rousseau, *Appl. Catal. A: Gen.* 2008, **346**, 86.
3. A. T. Khan and Md. Musawwer Khan, *Carbohydr. Res.* 2010, **345**, 154.
4. (a) K. A. De Castro, S. Oh, J. Yun, J. K. Lim, G. An, D. K. Kim and H. Rhee, *Synth. Commun.* 2009, **39**, 3509. (b) B. Štefane and S. Polanc, *Tetrahedron* 2009, **65**, 2339.
5. (a) D. Kuck and H.-F. Grützmacher, *Org. Mass Spectrom.* 1978, **13**, 90. (b) G. Boche, D. R. Schneider and K. Wernicke, *Tetrahedron Lett.* 1984, **25**, 2961.

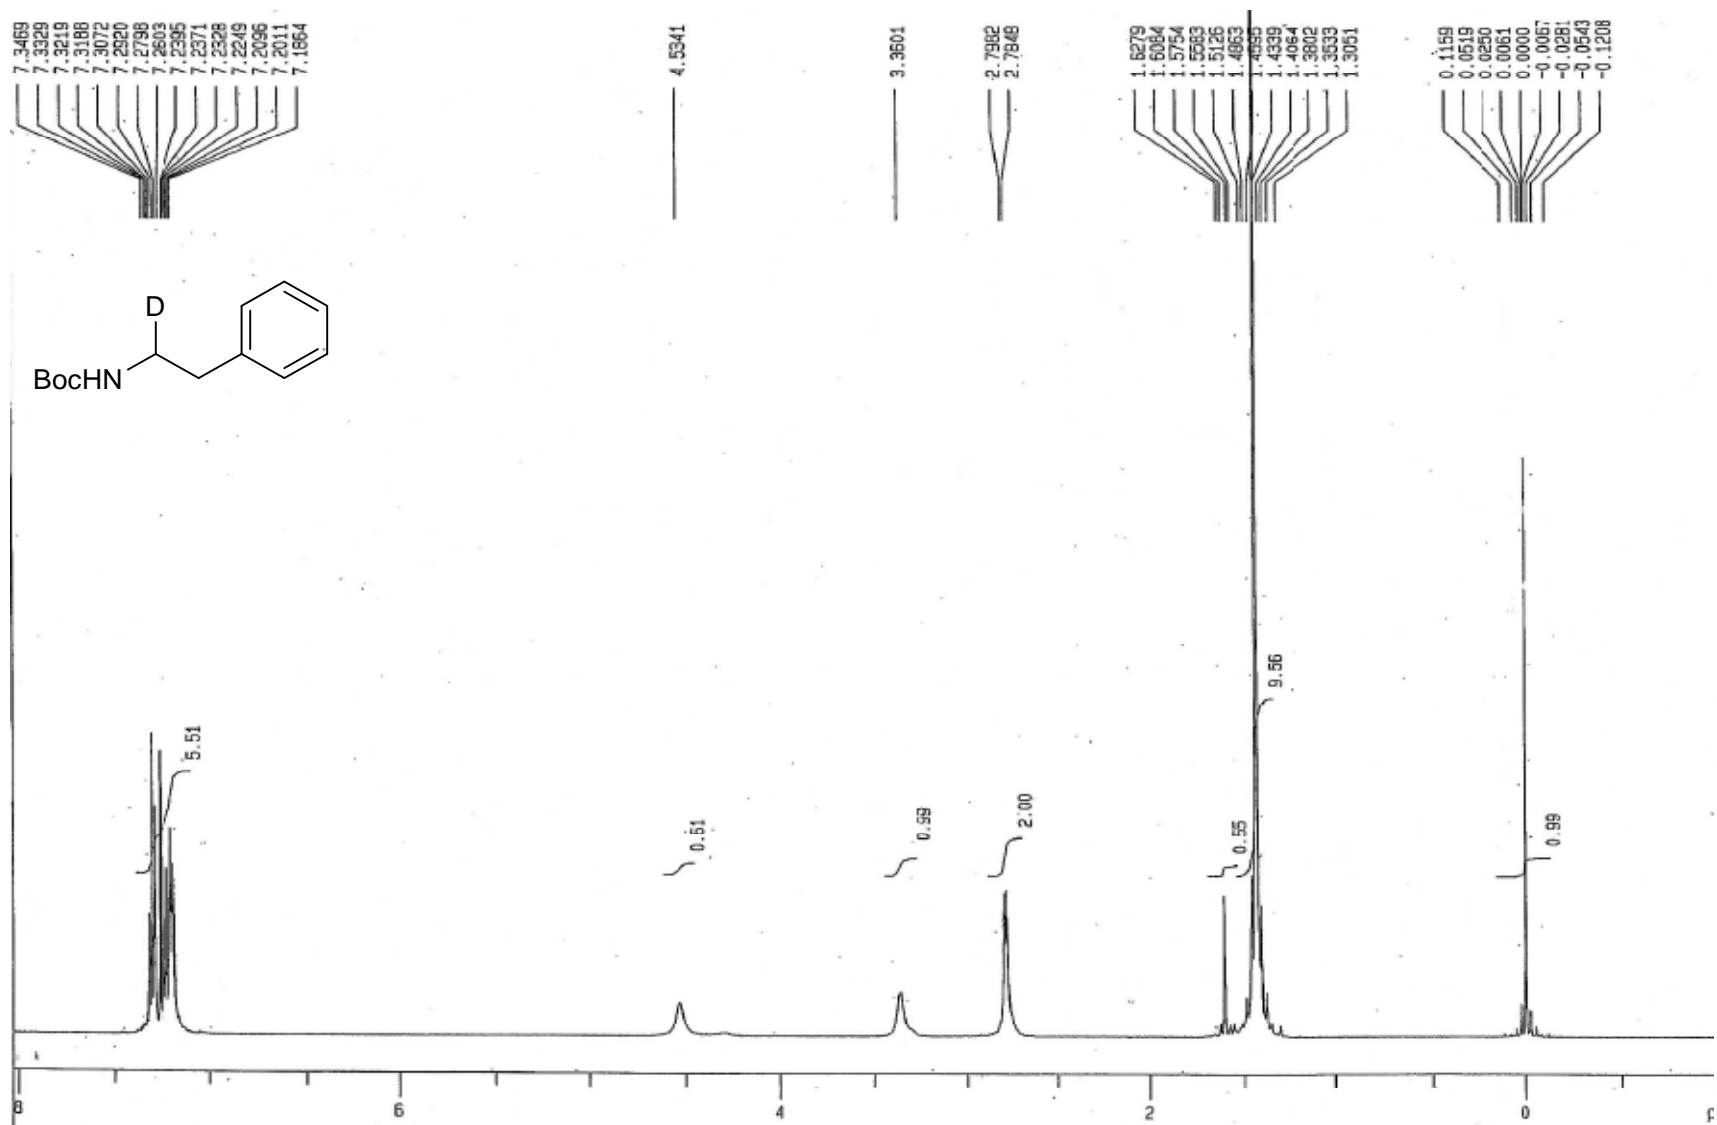

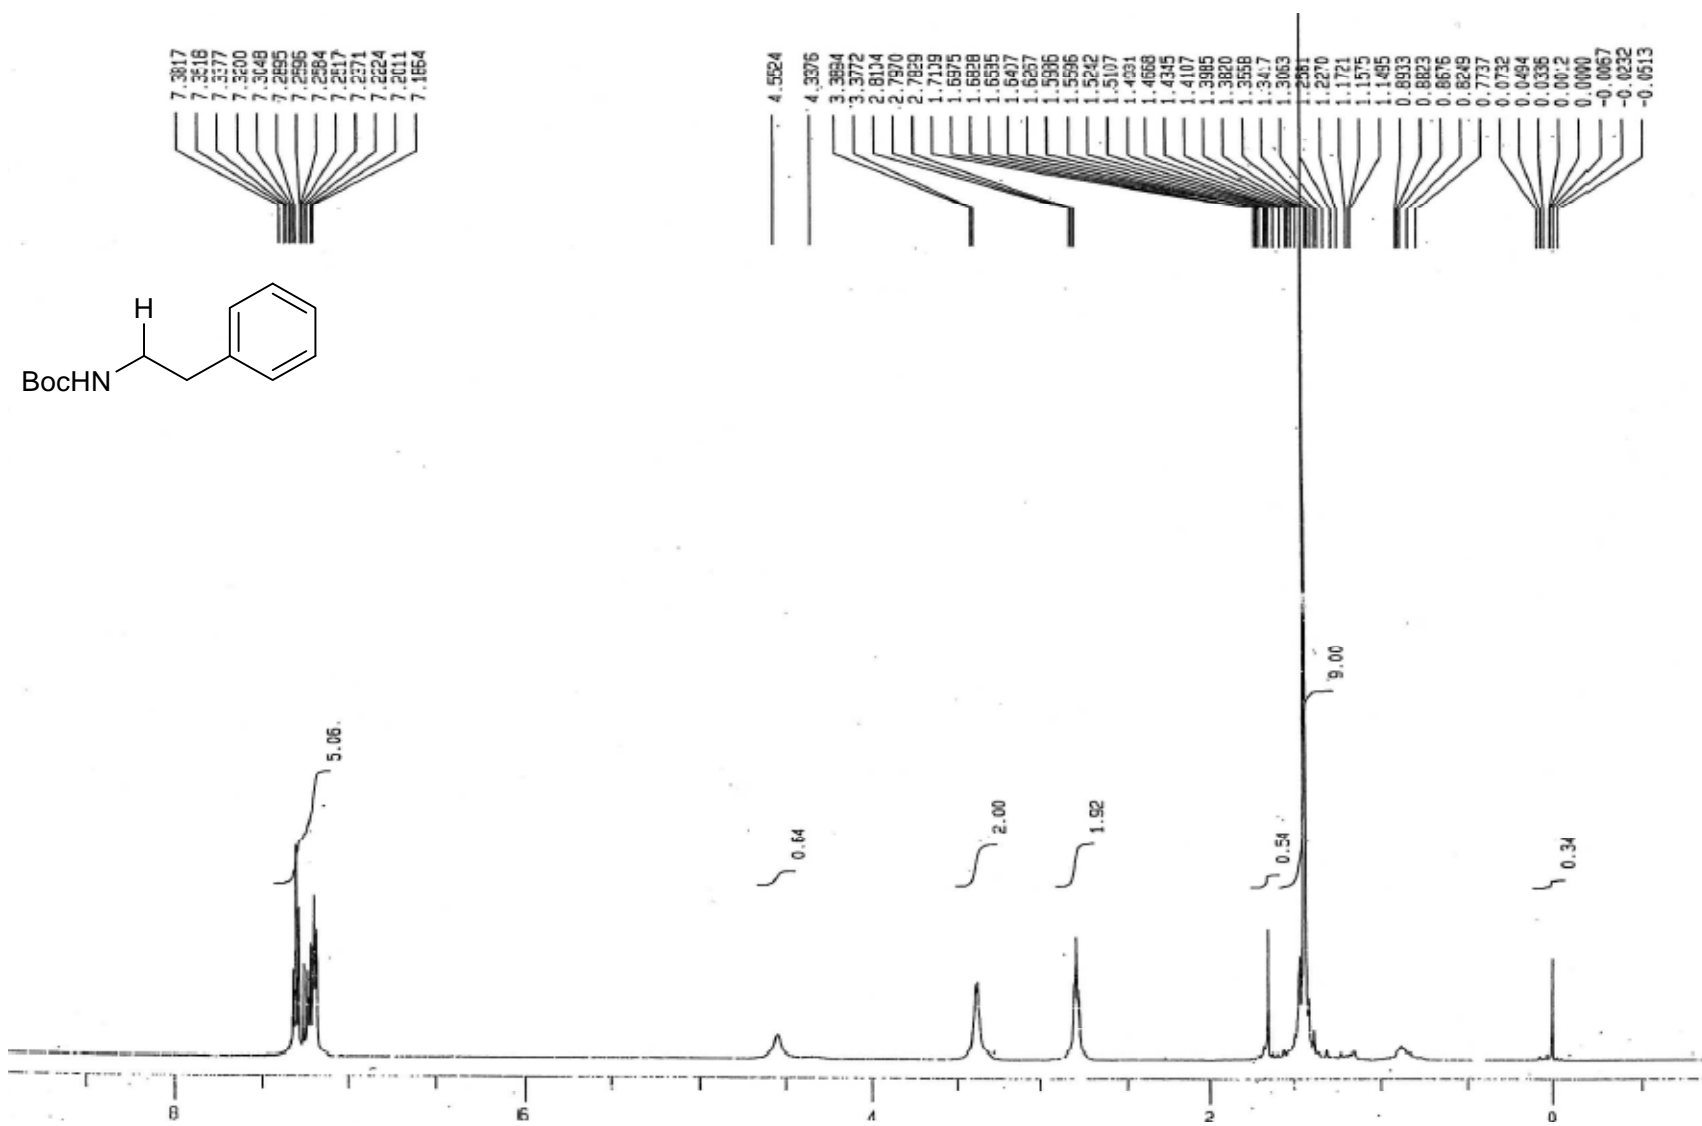



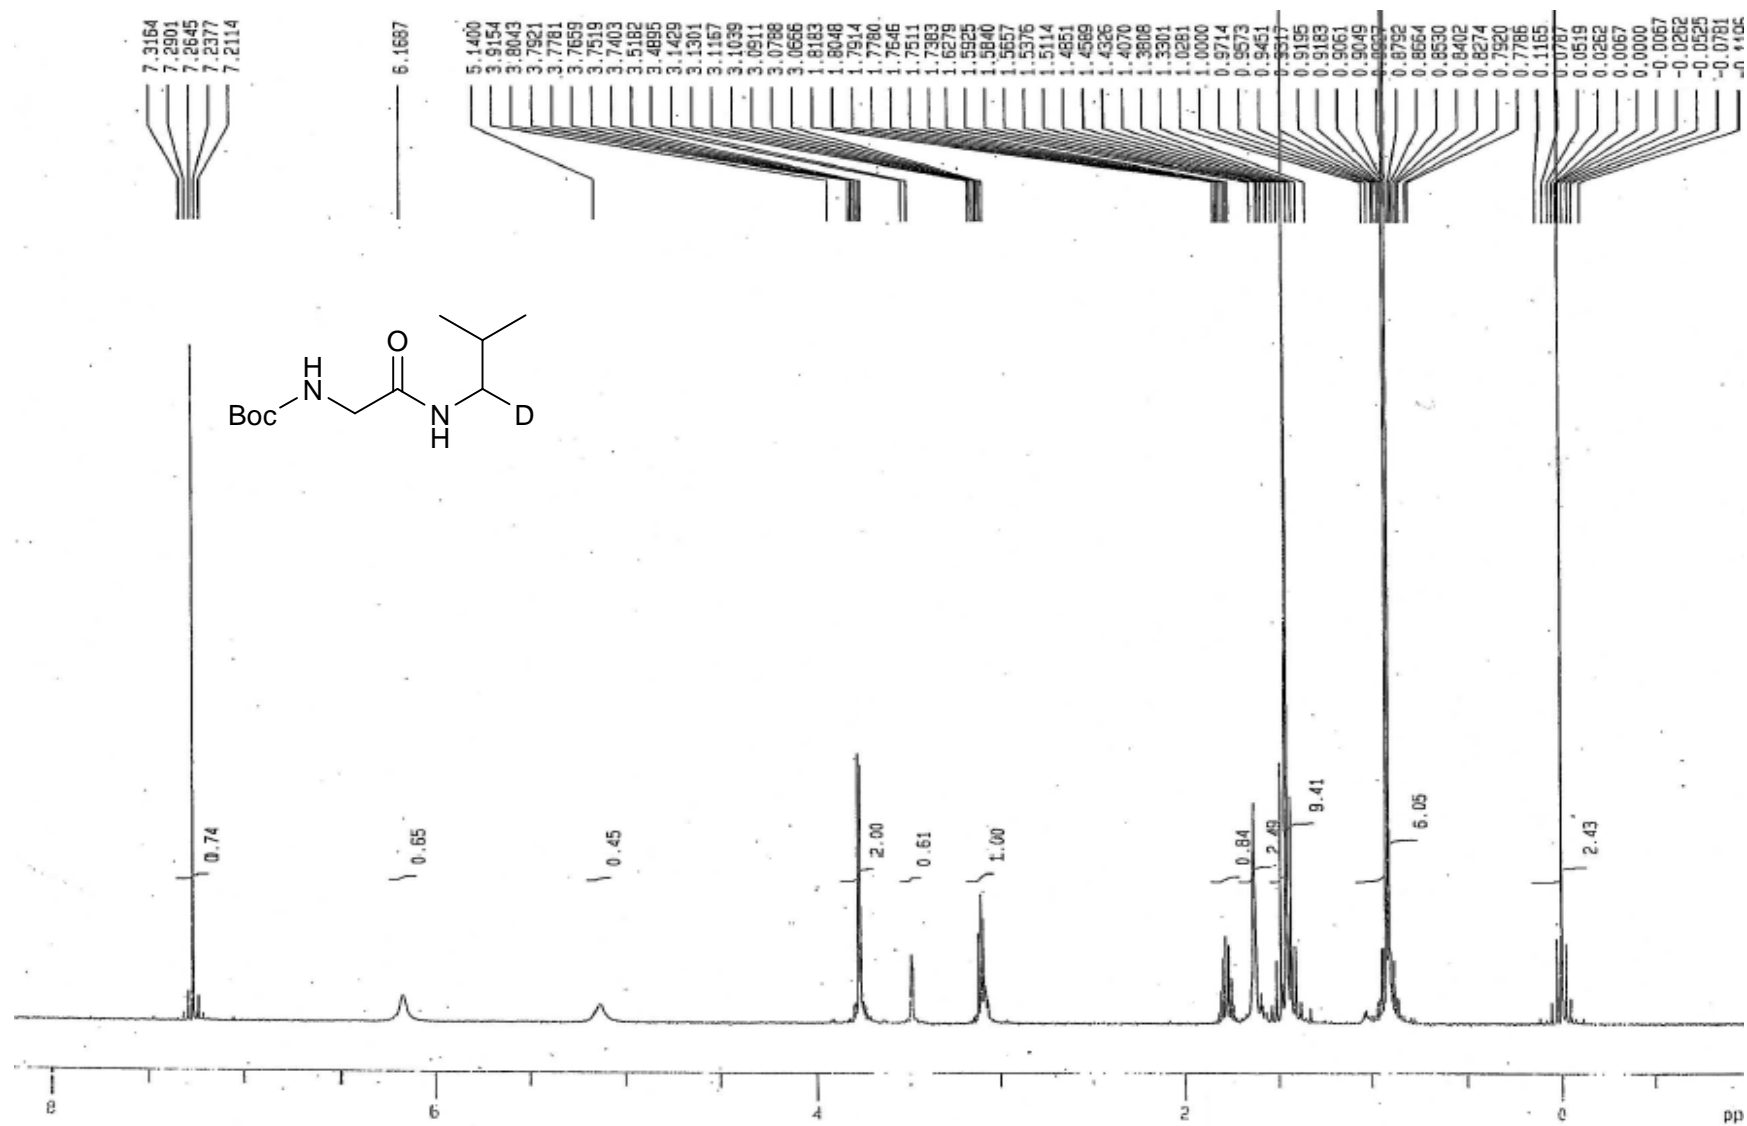

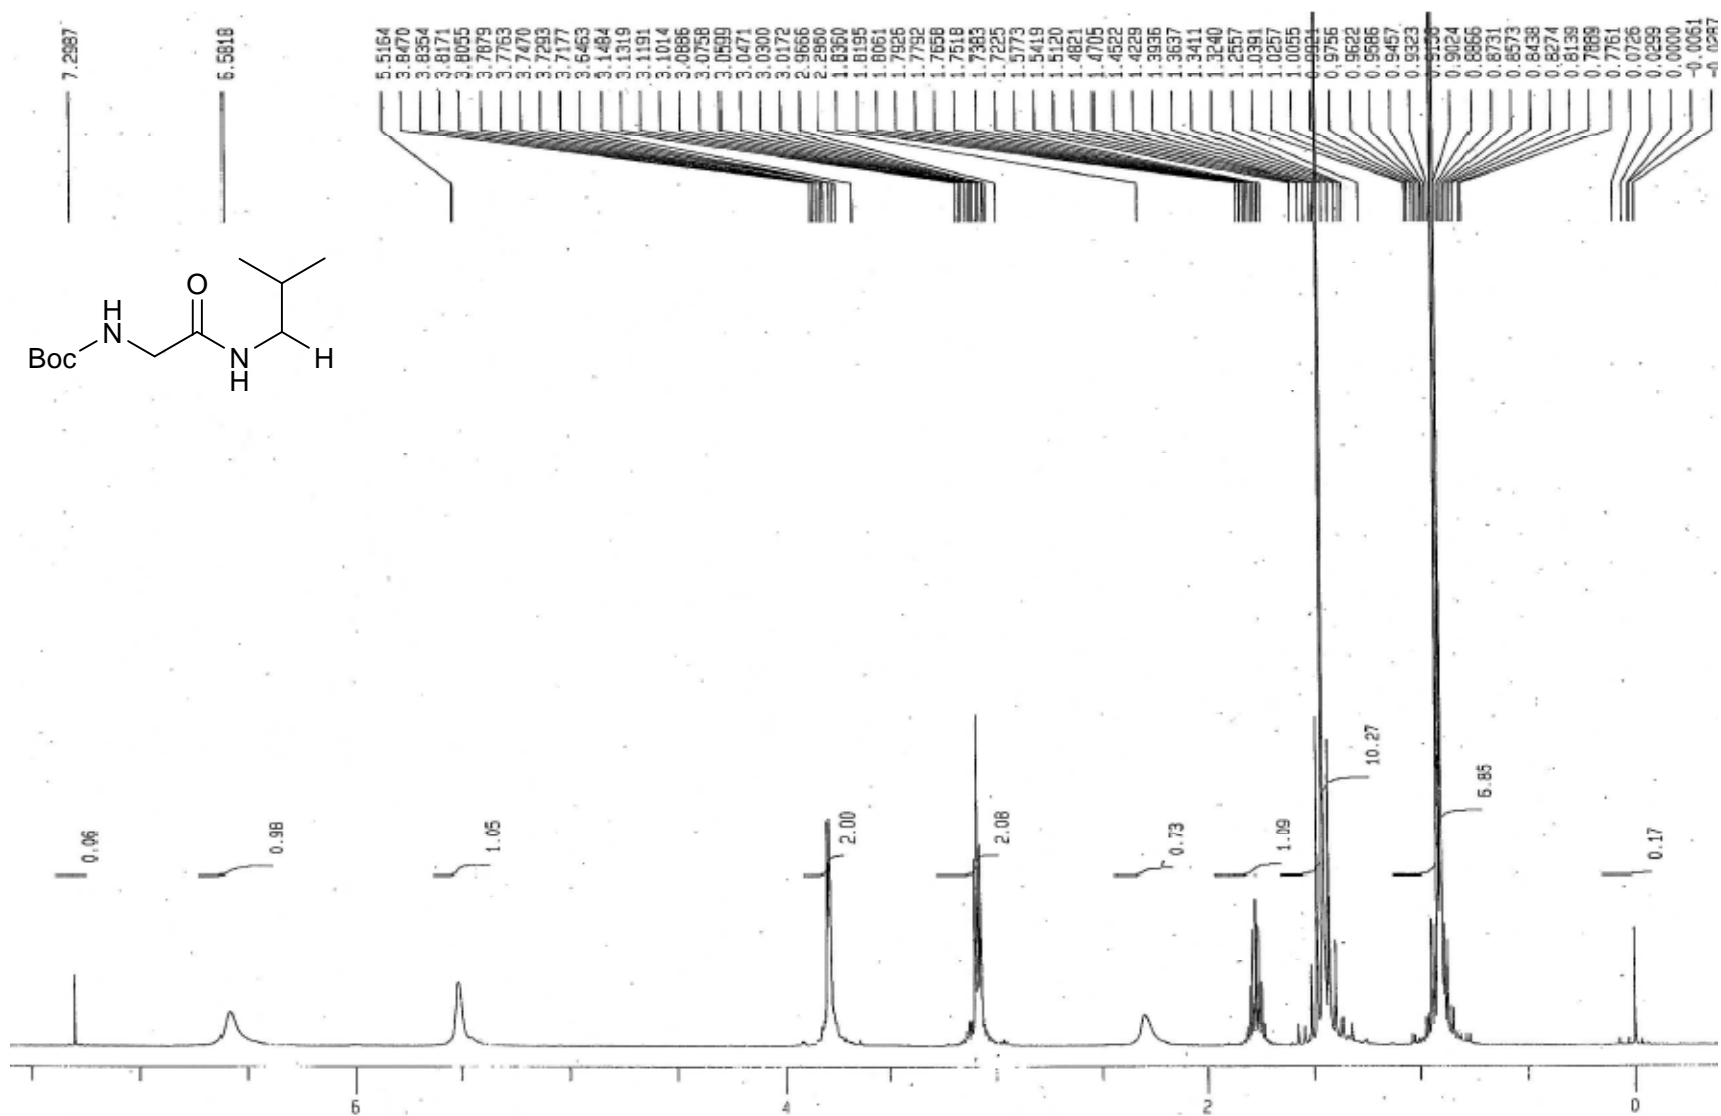



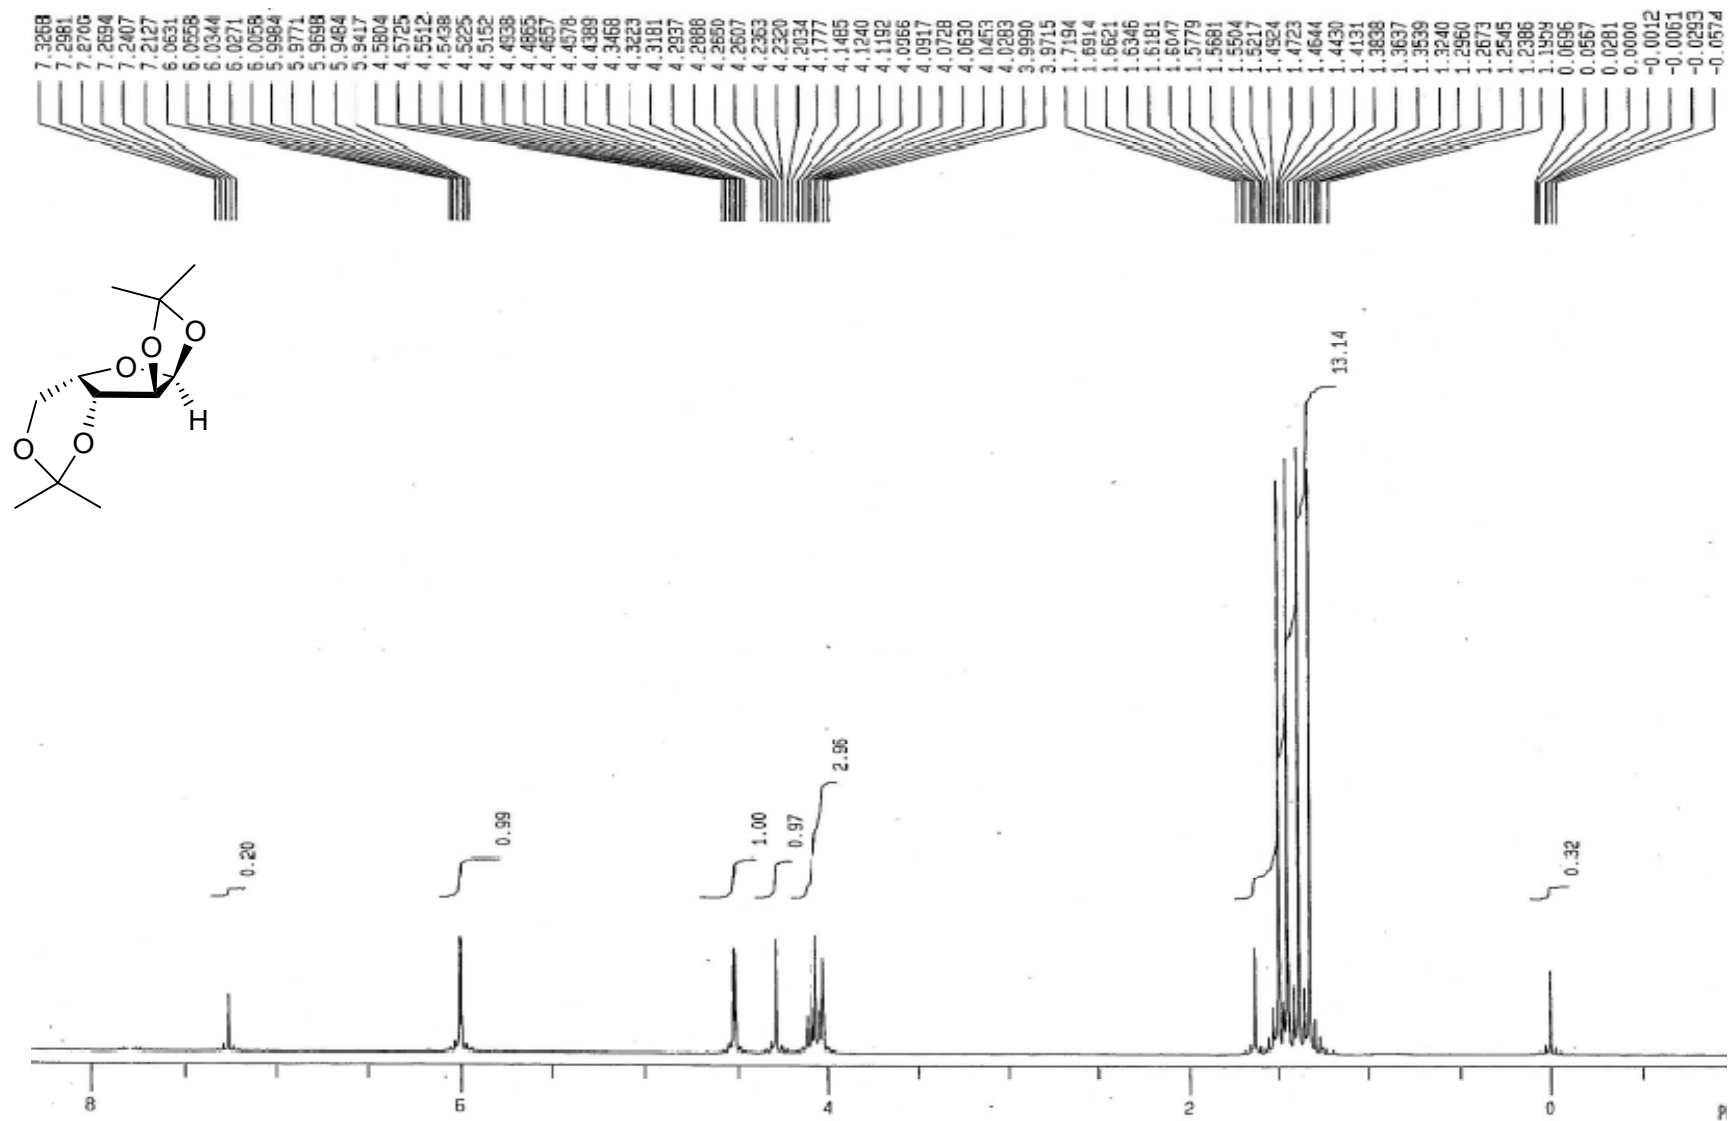

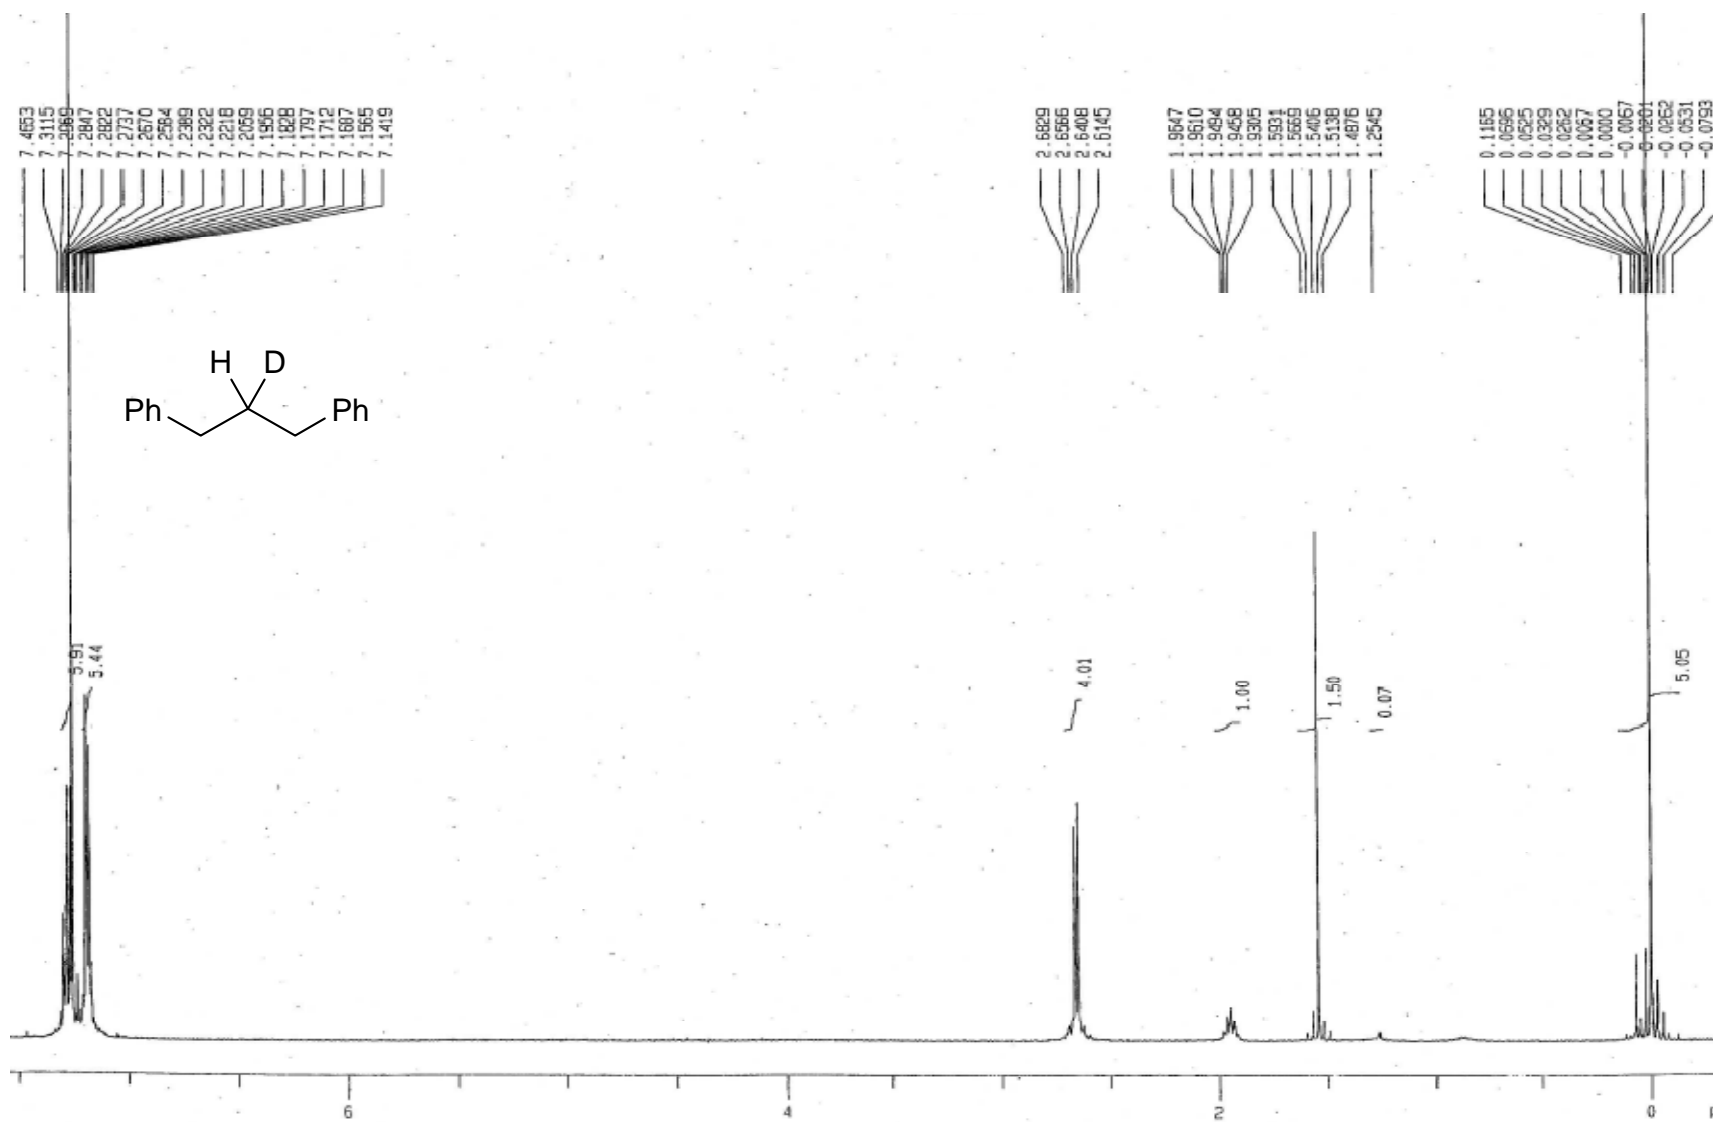

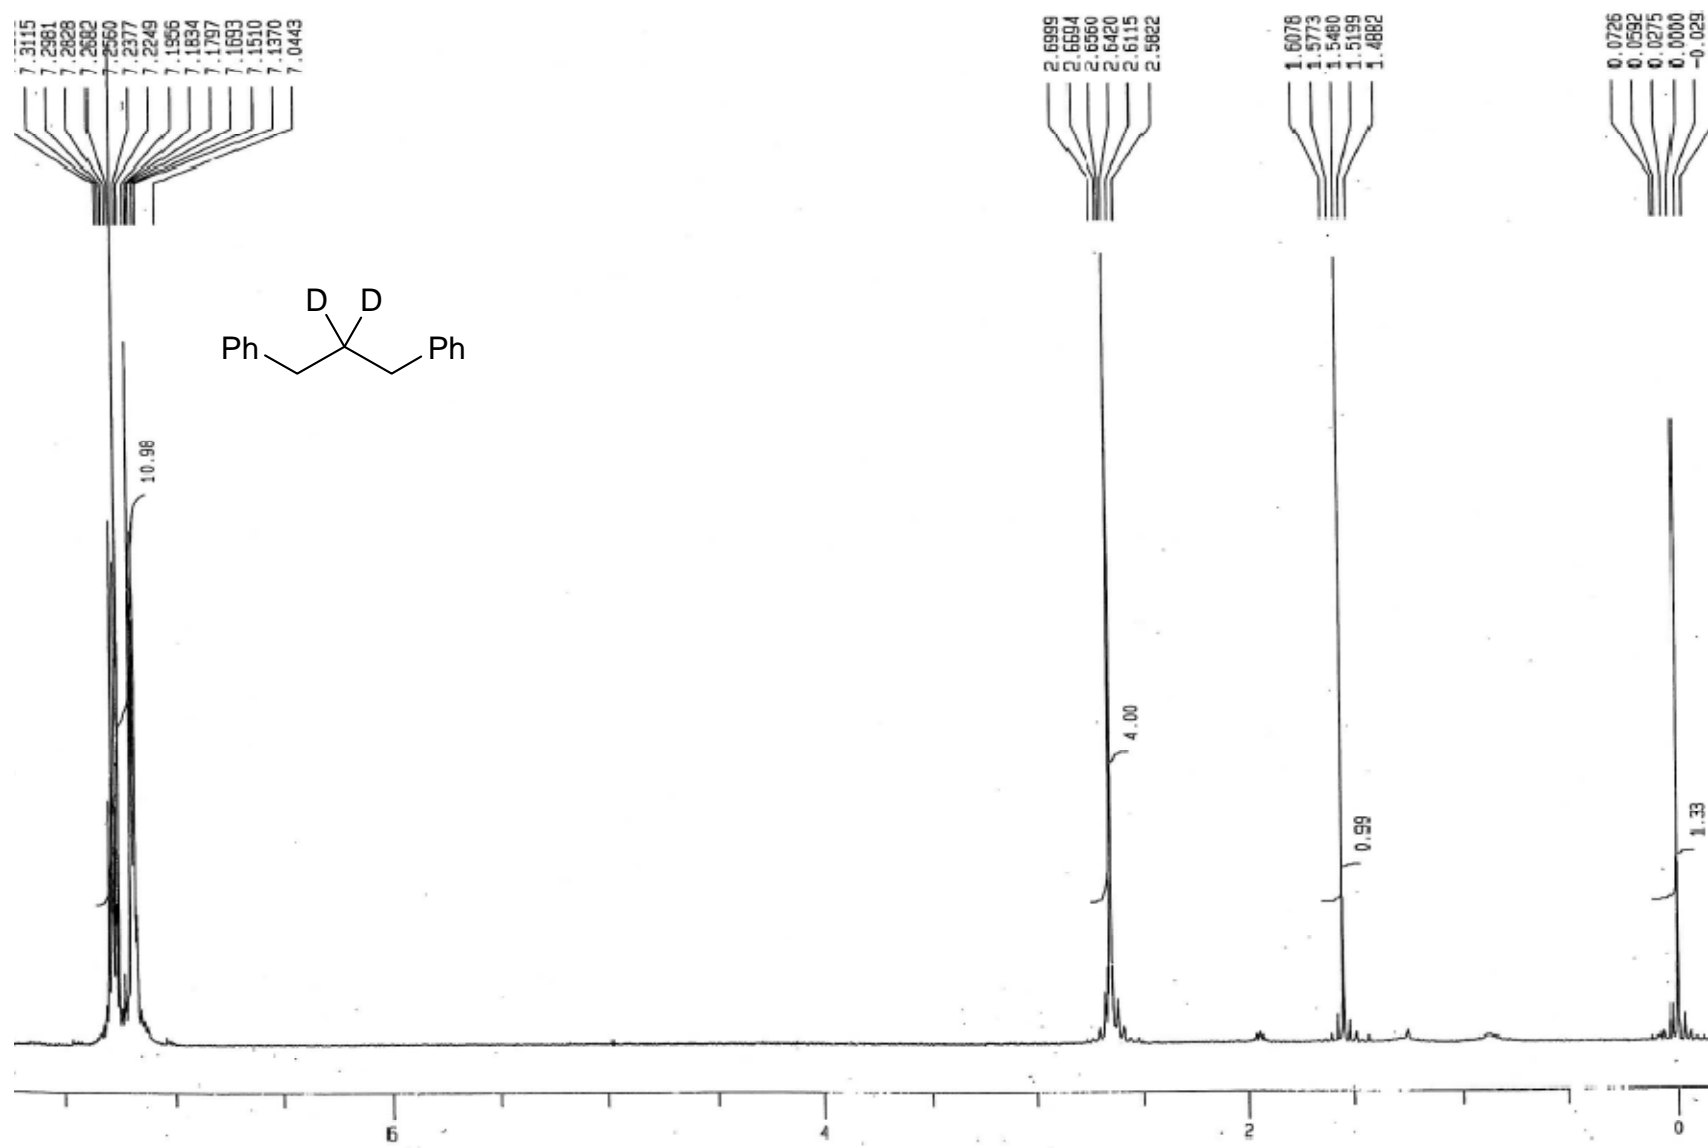

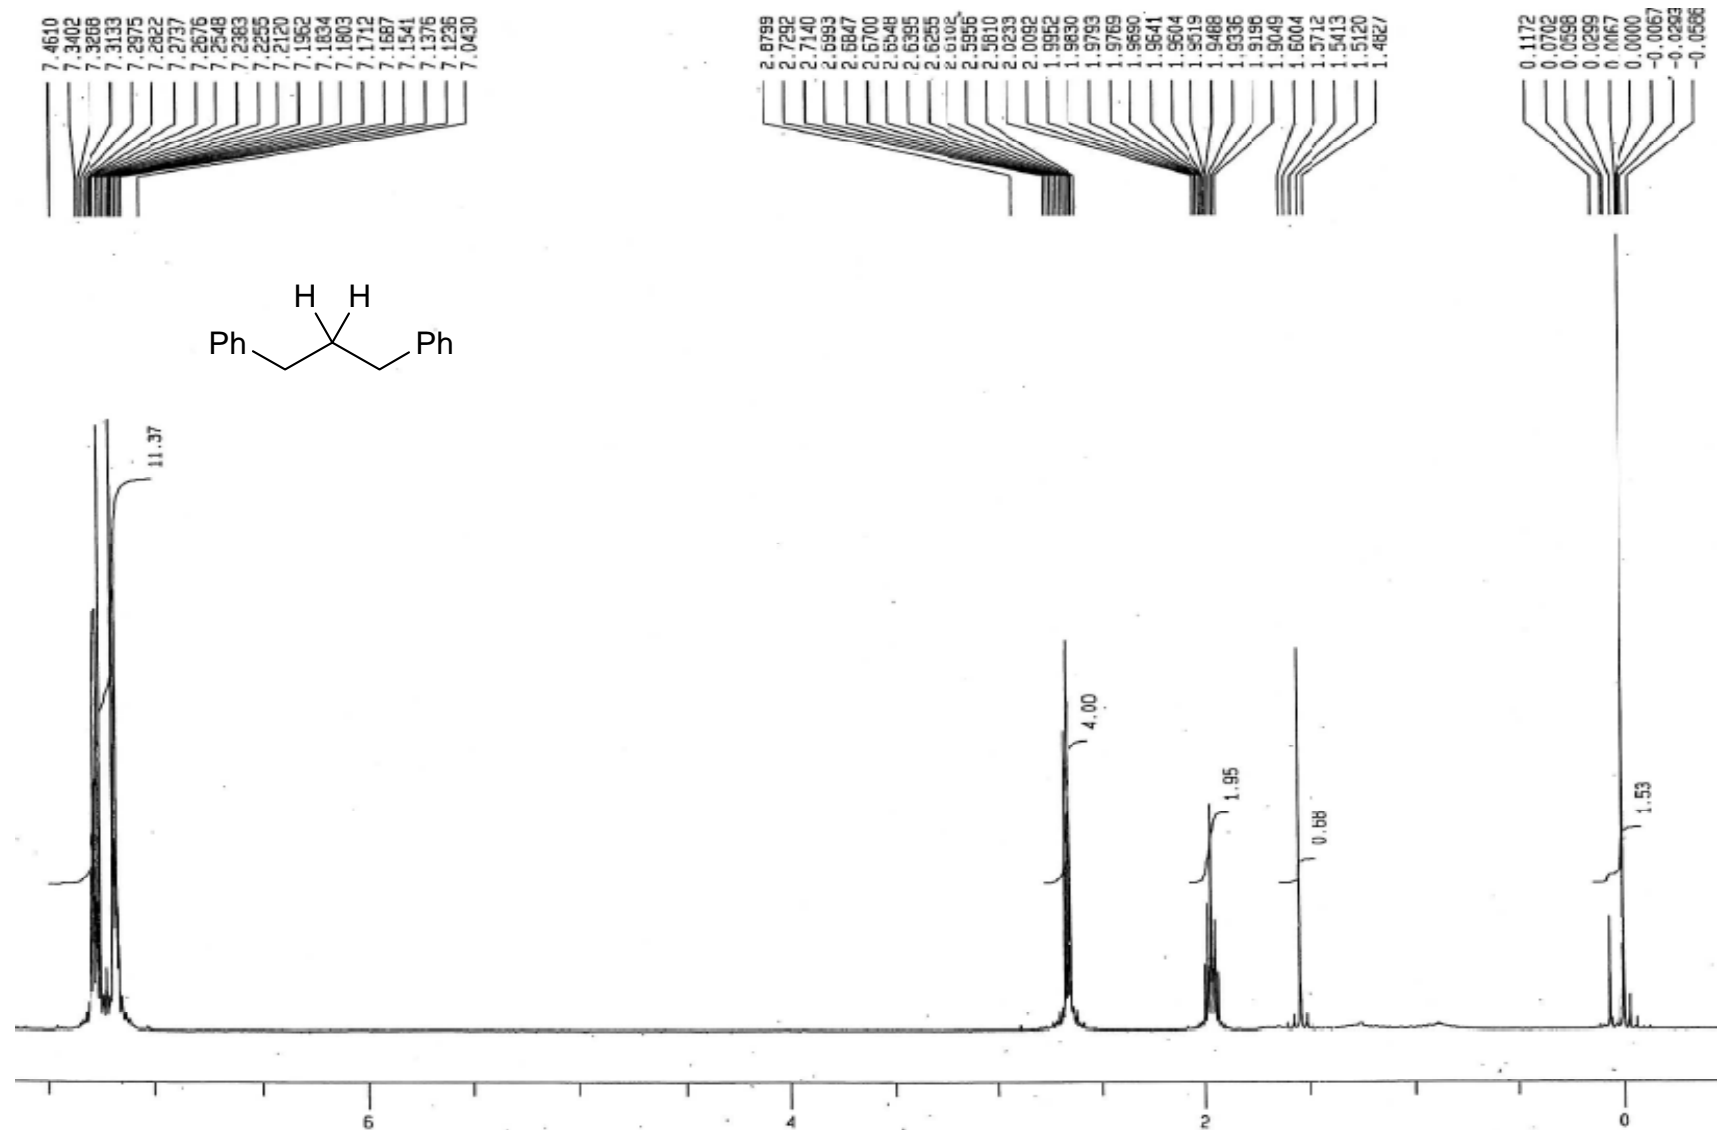

Supplement: c0cc01464h.pdf [file c0cc01464h.pdf]
